# Supplementary material for: Dynamic Changes in the Extracellular Matrix in Primary, Metastatic, and Recurrent Ovarian Cancers
Source: MDPI journal article supplement (doi:10.3390/cells11233769), 2022-11-25
Supplement: s1 [file s1]

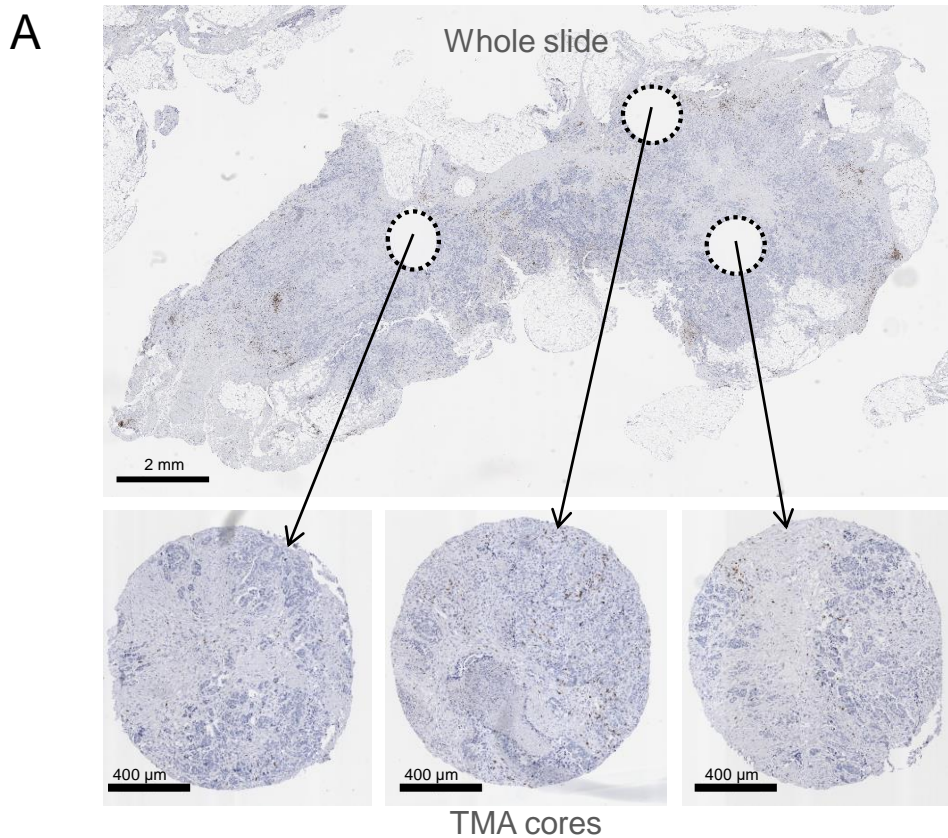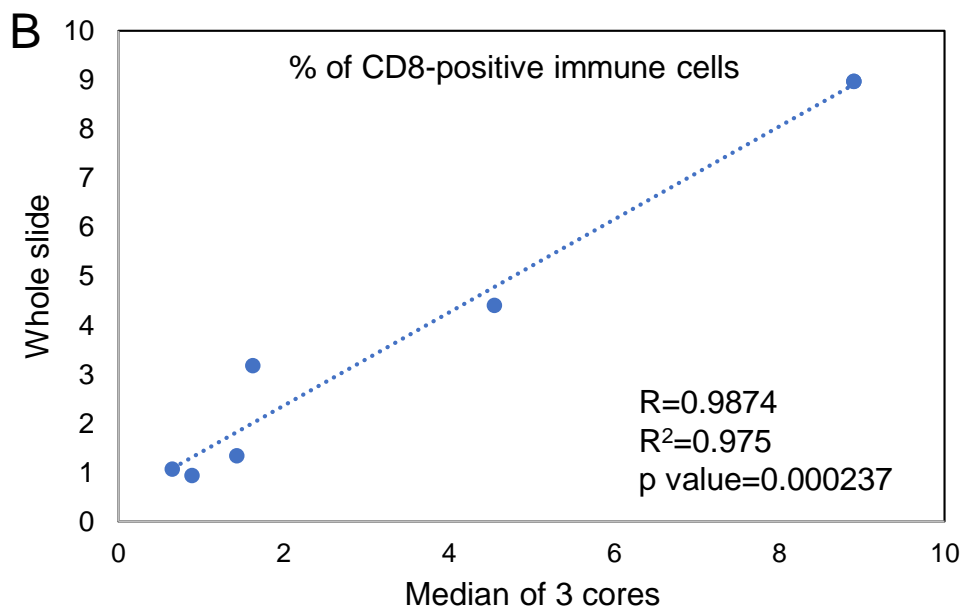

**Supplementary Figure S1.** Correlation between % of CD8-positive immune cells in whole slides vs TMA cores. **(A)** A whole section and the corresponding TMA cores stained with CD8 antibody with a hematoxylin background. **(B)** Pearson correlation between % CD8-positive immune cells in 6 whole sections and the median of 3 corresponding TMA cores from each section. CD8-positive immune cells were identified using QuPath.

| Patient | % stroma-associated CD8 T |            |           | % cancer cell-associated CD8 T |            |           |
|---------|---------------------------|------------|-----------|--------------------------------|------------|-----------|
|         | Primary                   | Metastatic | Recurrent | Primary                        | Metastatic | Recurrent |
| 1       | 11.97                     | 4.225      | 27.78     | 2.443                          | 1.384      | 26.07     |
| 2       | 1.383                     | 1.006      | 3.4055    | 0.2124                         | 0.2816     | 1.31905   |
| 3       | 3.054                     | 5.939      | 2.143     | 2.079                          | 2.22       | 0.8403    |
| 4       | 1.151                     | 3.991      | 0.9674    | 0.1928                         | 1.674      | 0.0509    |
| 5       | 0.3879                    | 17.93      | 2.983     | 0.4938                         | 4.014      | 0.6327    |
| 6       | 1.169                     | 2.763      | 2.206     | 1.3029                         | 1.174      | 0.6148    |
| 7       | 1.439                     | 1.688      | 1.807     | 0.5688                         | 0.5319     | 0.545     |
| 8       | 0.8652                    | 8.491      | 1.656     | 0.0681                         | 6.249      | 0.1835    |
| 9       | 3.417                     | 7.833      | 5.163     | 3.312                          | 2.89       | 2.256     |
| 10      | 12.2                      | 12.255     | 15.12     | 5.373                          | 6.1535     | 19.13     |
| 11      | 12.04                     | 8.358      | 31.535    | 6.644                          | 2.444      | 15.105    |
| 12      | 2.121                     | 6.25       | 0.3183    | 0.6092                         | 1.74       | 0.0435    |
| 13      | 2.873                     | 7.844      | 2.305     | 3.527                          | 1.2317     | 0.7192    |
| 14      | 11.566                    | 6.884      | 3.775     | 6.349                          | 3.419      | 2.7365    |
| 15      | 3.686                     | 5.14       | 9.165     | 1.814                          | 3.994      | 2.73      |
| 16      | 12.516                    | 6.389      | 8.428     | 1.746                          | 3.8565     | 1.571     |
| 17      | 0.2746                    | 4.907      | 4.95      | 0.0355                         | 0.7697     | 1.021     |
| 18      | 4.049                     | 6.625      | 8.699     | 1.006                          | 3.612      | 3.22      |
| 19      | 11.87                     | 12.63      | 6.596     | 7.013                          | 5.867      | 2.677     |
| 20      | 9.568                     | 3.237      | 1.882     | 5.816                          | 0.8576     | 2.541     |
| 21      | 1.241                     | 3.57       | 17        | 0.3384                         | 0.3795     | 5.733     |
| 22      | 0.3243                    | 11.74      | 0.2614    | 0.1332                         | 3.757      | 0.14795   |
| 23      | 6.767                     | 13.86      | 3.11455   | 1.491                          | 6.333      | 2.64295   |
| 24      | 4.4435                    | 2.847      | 6.055     | 1.091                          | 0.1395     | 0.8943    |
| 25      | 1.627                     | 7.109      | 11.19     | 0.4441                         | 0.4184     | 3.681     |
| 26      | 0.36495                   | 5.71       | 2.95965   | 0.01165                        | 2.513      | 0.1117    |
| 27      | 0.7678                    | 21.85      | 0.82005   | 0.0543                         | 6.075      | 0.35515   |
| 28      | 0.5079                    | 19.71      | 4.508     | 0.119                          | 6.488      | 0.9434    |
| 29      | 1.821                     | 5.259      | 27.46     | 0.2805                         | 0.8054     | 11.5      |
| 30      | 0.6315                    | 6.425      | 1.63      | 0.1145                         | 1.159      | 0.172     |
| 31      | 3.152                     | 1.294      | 6.314     | 0.7531                         | 0.1416     | 1.036     |
| 32      | 0.3551                    | 10.2       | 1.806     | 0.0655                         | 2.255      | 0.0494    |
| 33      | 20.735                    | 4.472      | 1.962     | 7.0385                         | 2.386      | 0.2421    |
| 34      | 6.1095                    | 2.959      | 2.874     | 2.302                          | 1.612      | 0         |
| 35      | 2.15                      | 10.88      | 5.473     | 0.21665                        | 5.738      | 1.565     |
| 36      | 1.598                     | 7.139      | 1.321     | 0.202                          | 9.463      | 0.0728    |
| 37      | 6.333                     | 20.735     | 5.104     | 1.37                           | 7.546      | 3.511     |
| 38      | 22.63                     | 18.57      | 6.858     | 33.06                          | 13.11      | 4.088     |
| 39      | 4.403                     | 9.7885     | 14.46     | 0.9833                         | 6.9625     | 0.6649    |
| 40      | 5.928                     | 6.905      | 10.19     | 2.049                          | 3.925      | 4.139     |

**Supplementary Table S1.** Forty patients with high-grade serous ovarian cancer (HGSOC) were analyzed for the median percentage of stroma- and cancer cell-associated CD8-positive cells using QuPath. The numerical values are color coded for easier visualization of CD8-positive cell patterns in each patient.
